# Supplementary material for: Let Us Give Voice to Local Farmers: Preferences for Farm-Based Strategies to Enhance Human–Elephant Coexistence in Africa
Source: MDPI journal article supplement (doi:10.3390/ani12141867), 2022-07-21
Supplement: s1 [file s1]

**Table S1.** Principal characteristics of respondents in the Selous-Niassa Wildlife Corridor.

| Class                                                   | N=480 |
|---------------------------------------------------------|-------|
| Gender:                                                 |       |
| Female                                                  | 239   |
| Male                                                    | 241   |
| Age (years):                                            |       |
| 18-30                                                   | 77    |
| 30-40                                                   | 158   |
| 40-50                                                   | 129   |
| 50-60                                                   | 71    |
| >60                                                     | 45    |
| Main occupation                                         |       |
| Agriculture                                             | 455   |
| Livestock keeping                                       | 14    |
| Teacher                                                 | 9     |
| Not mentioned                                           | 2     |
| Originally from                                         |       |
| Same village where it was interviewed                   | 376   |
| Another village/town from Tunduru or Namtumbo districts | 51    |
| Outside of Tunduru or Namtumbo Districts                | 53    |
| Considered as the most conflictive wildlife             |       |
| Elephant                                                | 365   |
| Bushpig                                                 | 75    |
| Baboon                                                  | 10    |
| Hyena                                                   | 8     |
| Lion                                                    | 7     |
| Vervet monkey                                           | 7     |
| Eland                                                   | 3     |
| Leopard                                                 | 2     |
| Impala                                                  | 1     |
| Jackal                                                  | 1     |
| Warthog                                                 | 1     |
