# Supplementary material for: Let Us Give Voice to Local Farmers: Preferences for Farm-Based Strategies to Enhance Human–Elephant Coexistence in Africa
Source: MDPI journal article supplement (doi:10.3390/ani12141867), 2022-07-21
Supplement: s1 [file s1]

**Table S2.** Willingness to pay. Results of the random parameter logit model. (\*\*\*) significance at 1% level; \*\* significance at 5% level, \* significance at 10% level).

|                             | Coefficient | Standard Error | Z     | Prob.  z >Z* | 95%Condidence Interval |
|-----------------------------|-------------|----------------|-------|--------------|------------------------|
| Chili-oil fences            | 11.062 ***  | 1.2306         | 8.99  | <0.001       | (8.650, 13.4735)       |
| Bee-hive fences             | 6.460 ***   | 1.2557         | 5.14  | <0.001       | (3.9991, 8.9212)       |
| Technical support           | 6.001 ***   | 0.7716         | 7.78  | <0.001       | (4.4885, 7.5131)       |
| Cooperation in big groups   | 3.990 ***   | 0.5976         | 6.68  | <0.001       | (2.8184, 5.1607)       |
| Crop selection              | 2.630 **    | 1.1090         | 2.37  | 0.018        | (0.4560, 4.8032)       |
| Cooperation in small groups | -0.217      | 0.5476         | -0.40 | 0.692        | (-1.2901, 0.8565)      |
| Noisemakers                 | -0.687      | 1.2157         | -0.57 | 0.572        | (-3.0700, 1.6953)      |
| Crop translocation          | -3.529 ***  | 1.0826         | -3.26 | 0.001        | (-5.6507, -1.4068)     |
| Not doing anything          | -22.670 *** | 2.4599         | -9.22 | <0.001       | (-27.491, -17.849)     |
