# Supplementary material for: Let Us Give Voice to Local Farmers: Preferences for Farm-Based Strategies to Enhance Human–Elephant Coexistence in Africa
Source: MDPI journal article supplement (doi:10.3390/ani12141867), 2022-07-21
Supplement: s1 [file s1]

Questionnaire. Main questions related to previous experience with elephants and crop damage mitigation measures.

**Personal information:**

Village \_\_\_\_\_ ☐ Farms ☐ Village center

Gender: ☐ Female ☐ Male

How old are you? \_\_\_\_\_

What is your main activity or principal source of income? \_\_\_\_\_

Does your home usually suffer from a period of food shortage?

☐ Yes, In which months?:

| January                  | February                 | March                    | April                    | May                      | June                     | July                     | August                   | September                | October                  | November                 | December                 |
|--------------------------|--------------------------|--------------------------|--------------------------|--------------------------|--------------------------|--------------------------|--------------------------|--------------------------|--------------------------|--------------------------|--------------------------|
| <input type="checkbox"/> |

☐ Yes, In which months?:

☐ No

What is your opinion on the following elephant management actions. Are they effective to reduce elephant crop-raiding?

|                                          | Strongly disagree        | Disagree                 | Agree                    | Strongly agree           | Don't know               |
|------------------------------------------|--------------------------|--------------------------|--------------------------|--------------------------|--------------------------|
| Installation of Chili-oil-covered fences | <input type="checkbox"/> |
| Using noise-makers (voices, sirens, ...) | <input type="checkbox"/> |
| Beehive fences                           | <input type="checkbox"/> |
| Crop selection                           | <input type="checkbox"/> |
| Crop relocation                          | <input type="checkbox"/> |
| Guarding crop fields at night            | <input type="checkbox"/> |
| Relocation of people away                | <input type="checkbox"/> |
| External technical advice                | <input type="checkbox"/> |

**Personal experience with elephants:**

Do you know someone who has ever been charged by an elephant?

- ☐ No
- ☐ I've heard about someone
- ☐ Yes, someone from this village
- ☐ Yes, a friend or a neighbor
- ☐ Yes, a close family member
- ☐ Yes, Me

Do you know someone who has been involved in an elephant crop-damage situation?

- ☐ No
- ☐ I've heard about someone
- ☐ Yes, someone from this village
- ☐ Yes, a friend or a neighbor
- ☐ Yes, a close family member
- ☐ Yes, Me

In the last elephant crop-damage situation, were they using any kind of deterrent method against elephants?

☐ Yes. Please, specify: \_\_\_\_\_ ☐ No ☐ I don't know
