# Supplementary material for: Let Us Give Voice to Local Farmers: Preferences for Farm-Based Strategies to Enhance Human–Elephant Coexistence in Africa
Source: Animals (Basel). 2022 Jul 21;12(14):1867. doi: 10.3390/ani12141867 (PMC9311559; doi:10.3390/ani12141867)
Supplement: Supplementary file 1 [file animals-12-01867-s001.zip]

Archive with 4 entries (4 files):
- animals-1814890-Supplementary File A.pdf
- animals-1814890-Supplementary File B.pdf
- animals-1814890-Table S1.pdf
- animals-1814890-Table S2.pdf
